# Supplementary material for: Is the Life History Flexibility of Cold Desert Annuals Broad Enough to Cope with Predicted Climate Change? The Case of Erodium oxyrhinchum in Central Asia
Source: MDPI journal article supplement (doi:10.3390/biology10080780), 2021-08-16
Supplement: s1 [file s1]

### Supplemental tables

**Supplemental Table S1.** Pearson correlations among life history traits of spring germinating plants (SG) of *Erodium oxyrhinchum* in wet springs.

|     | Ht     | RI     | NI     | La     | Nb     | Ib     | ArO    | AsT    | AIE    | ArE |
|-----|--------|--------|--------|--------|--------|--------|--------|--------|--------|-----|
| Ht  | 1      |        |        |        |        |        |        |        |        |     |
| RI  | .330** | 1      |        |        |        |        |        |        |        |     |
| NI  | .757** | .499** | 1      |        |        |        |        |        |        |     |
| La  | .493** | 0.046  | .651** | 1      |        |        |        |        |        |     |
| Nb  | .612** | .499** | .788** | .550** | 1      |        |        |        |        |     |
| Ib  | .901** | .320** | .862** | .696** | .687** | 1      |        |        |        |     |
| ArO | .762** | .286** | .814** | .818** | .665** | .927** | 1      |        |        |     |
| AsT | .870** | .302** | .848** | .677** | .677** | .975** | .896** | 1      |        |     |
| AIE | .673** | .395** | .878** | .817** | .729** | .859** | .884** | .841** | 1      |     |
| ArE | .900** | .219*  | .664** | .426** | .503** | .890** | .731** | .820** | .563** | 1   |

Ht, height; RI, root length; NI, number of leaves; La, leaf area; Nb, number of branches; Ib, individual biomass; ArO, allocation of biomass

to roots; AsT, allocation to stems; AIE, allocation of biomass to leaves; ArE, allocation of biomass to reproduction. N = 128, \*P < 0.05, \*\*P < 0.01.

**Supplemental Table S2** Pearson correlations among life history traits of autumn germinating plants (AG) of *Erodium oxyrhinchum* in wet springs.

|     | Ht     | Rl     | Nl     | La     | Nb     | Ib     | ArO    | AsT    | AIE    | ArE |
|-----|--------|--------|--------|--------|--------|--------|--------|--------|--------|-----|
| Ht  | 1      |        |        |        |        |        |        |        |        |     |
| Rl  | 0.228  | 1      |        |        |        |        |        |        |        |     |
| Nl  | .805** | .393** | 1      |        |        |        |        |        |        |     |
| La  | .416** | .595** | .606** | 1      |        |        |        |        |        |     |
| Nb  | .637** | .552** | .667** | .829** | 1      |        |        |        |        |     |
| Ib  | .909** | .320** | .900** | .589** | .668** | 1      |        |        |        |     |
| ArO | .849** | .458** | .869** | .665** | .736** | .940** | 1      |        |        |     |
| AsT | .897** | .280*  | .897** | .535** | .604** | .986** | .921** | 1      |        |     |
| AIE | .644** | .537** | .851** | .870** | .775** | .836** | .874** | .812** | 1      |     |
| ArE | .901** | 0.107  | .729** | .295*  | .489** | .902** | .768** | .868** | .540** | 1   |

Ht, height; Rl, root length; Ln, number of leaves; La, leaf area; Bn, number of branches; Ib, individual biomass; ArO, allocation of biomass to roots;

AsT, allocation of biomass to stems; AIE, allocation of biomass to leaves; ArE, allocation of biomass to reproduction. N =64, \*P <0.05, \*\*P <0.01.

**Supplemental Table S3** Pearson correlations among life history traits of spring germinating plants (SG) of *Erodium oxyrhinchum* in dry springs.

|            | <b>Ht</b> | <b>RI</b> | <b>NI</b> | <b>La</b> | <b>Nb</b> | <b>Ib</b> | <b>ArO</b> | <b>AsT</b> | <b>AlE</b> | <b>ArE</b> |
|------------|-----------|-----------|-----------|-----------|-----------|-----------|------------|------------|------------|------------|
| <b>Ht</b>  | 1         |           |           |           |           |           |            |            |            |            |
| <b>RI</b>  | 0.087     | 1         |           |           |           |           |            |            |            |            |
| <b>NI</b>  | .241*     | .279*     | 1         |           |           |           |            |            |            |            |
| <b>La</b>  | .388**    | 0.162     | .241*     | 1         |           |           |            |            |            |            |
| <b>Nb</b>  | -0.044    | -0.048    | 0.04      | 0.195     | 1         |           |            |            |            |            |
| <b>Ib</b>  | 0.246     | 0.083     | .330**    | .374**    | .331**    | 1         |            |            |            |            |
| <b>ArO</b> | 0.203     | 0.332     | 0.244     | 0.028     | 0.247     | .630**    | 1          |            |            |            |
| <b>AsT</b> | .536**    | .533**    | .351*     | .707**    | .353*     | .853**    | 0.278      | 1          |            |            |
| <b>AlE</b> | .617**    | .618**    | .412**    | .701**    | 0.264     | .808**    | 0.167      | .933**     | 1          |            |
| <b>ArE</b> | 0.291     | 0.343     | .446**    | .382*     | .389**    | .767**    | .448**     | .439**     | .415**     | 1          |

Ht, height; RI, root length; Ln, number of leaves ; La, leaf area; Bn, number of branches; Ib, individual biomass; ArO, allocation of biomass to roots;

AsT, allocation of biomass to stems; AlE, allocation of biomass to leaves; ArE, allocation of biomass to reproduction. N = 128, \*P <0.05, \*\*P <0.01.

**Supplemental Table S4** Pearson correlations among life history traits of autumn germinating plants (AG) of *Erodium oxyrhinchum* in dry springs.

|            | <b>Ht</b> | <b>RI</b> | <b>NI</b> | <b>La</b> | <b>Nb</b> | <b>Ib</b> | <b>ArO</b> | <b>AsT</b> | <b>AlE</b> | <b>ArE</b> |
|------------|-----------|-----------|-----------|-----------|-----------|-----------|------------|------------|------------|------------|
| <b>Ht</b>  | 1         |           |           |           |           |           |            |            |            |            |
| <b>RI</b>  | .242*     | 1         |           |           |           |           |            |            |            |            |
| <b>NI</b>  | 0.088     | 0.137     | 1         |           |           |           |            |            |            |            |
| <b>La</b>  | .466**    | .337*     | -0.054    | 1         |           |           |            |            |            |            |
| <b>Nb</b>  | .318**    | 0.205     | .277**    | 0.142     | 1         |           |            |            |            |            |
| <b>Ib</b>  | .287**    | 0.11      | .449**    | -0.119    | .229*     | 1         |            |            |            |            |
| <b>ArO</b> | 0.031     | 0.042     | .400**    | -0.064    | 0.115     | .394**    | 1          |            |            |            |
| <b>AsT</b> | .293**    | 0.05      | .387**    | -0.13     | 0.148     | .885**    | .288**     | 1          |            |            |
| <b>AlE</b> | 0.015     | 0.207     | .613**    | -0.176    | 0.132     | .694**    | .371**     | .480**     | 1          |            |
| <b>ArE</b> | .390**    | 0.084     | -0.009    | 0.004     | 0.086     | .612**    | 0.206      | .567**     | 0.142      | 1          |

Ht, height; RI, root length; Ln, number of leaves; La, leaf area; Bn, number of branches; Ib, individual biomass; ArO, allocation of biomass to roots;

AsT, allocation of biomass to stems; AlE, allocation of biomass to leaves; ArE, allocation of biomass to reproduction. N =128, \*P <0.05, \*\*P <0.01.
